# Supplementary material
Source: HighWire-hosted journal article supplement (https://bmjopen.bmj.com/content/12/5/e059225)
Supplement: inline-supplementary-material-1 [file inline-supplementary-material-1.pdf]

**Supplementary table 1: Descriptive information on social support**

| <b>Variables*</b>                    |                     |                                 |
|--------------------------------------|---------------------|---------------------------------|
| Total (N=190)                        | <i>Preoperative</i> | <i>Postoperative (3 months)</i> |
| Support from home, median (IQR)      | 25 (21 – 27)        | 25 (22 – 28)                    |
| Support from co-workers, n (%)       | 139 (73)            | 139 (73)                        |
| Support from supervisor, n (%)       | 119 (63)            | 115 (61)                        |
| Support from OP, n (%)               | 57 (30)             | 78 (41)                         |
| Support from GP, n (%)               | 73 (38)             | 75 (40)                         |
| Support from other caregivers, n (%) | 73 (38)             | 66 (35)                         |

*\*All numbers are represented as median with interquartile range (IQR), or numbers (n) and percentages (%).*
